# Supplementary material
Source: publisher figshare collection journal article supplement (https://asha.figshare.com/articles/dataset/_/28300112)

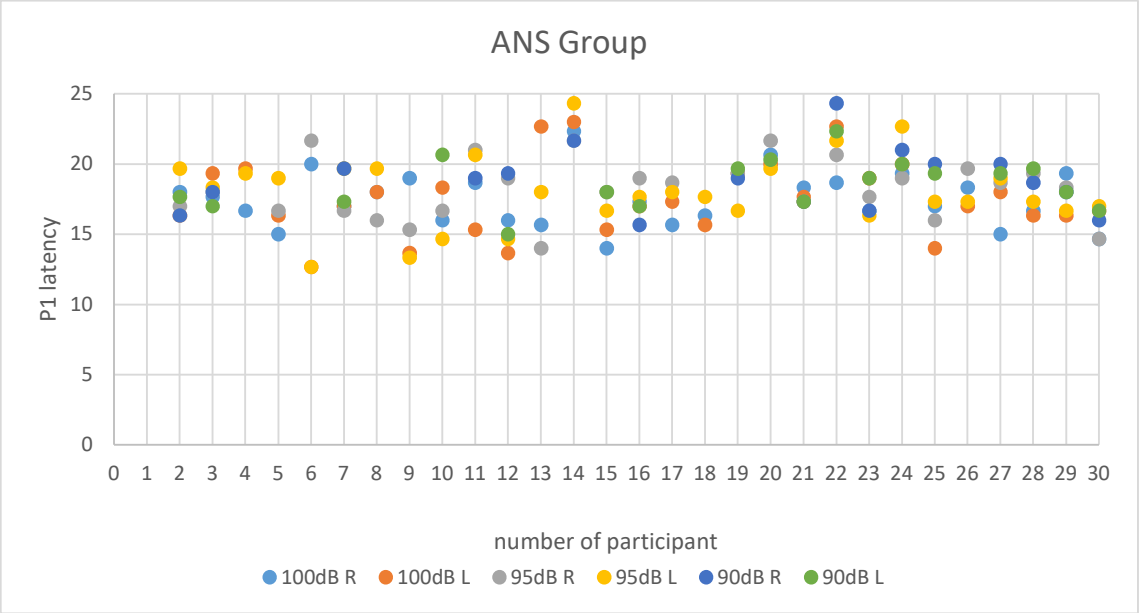

**Supplemental Material S2.** P1 latency data of each participant in the ANS group.

Supplement: Supplementary file 1 [file 1]

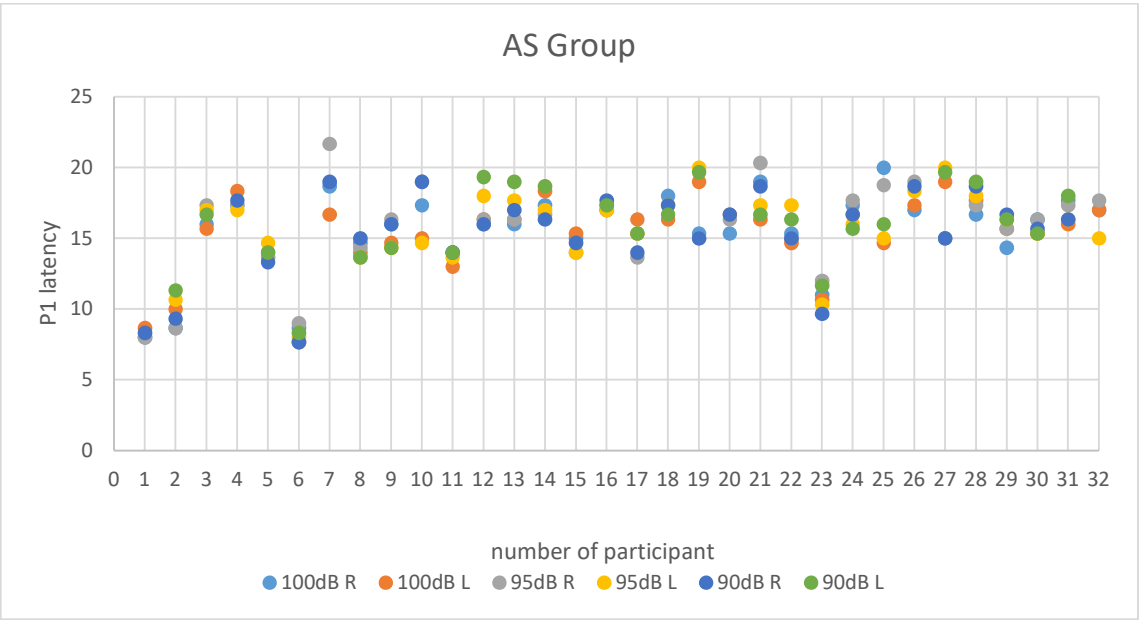

**Supplemental Material S1.** P1 latency data of each participant in the AS group.

Supplement: Supplementary file 2 [file 1]

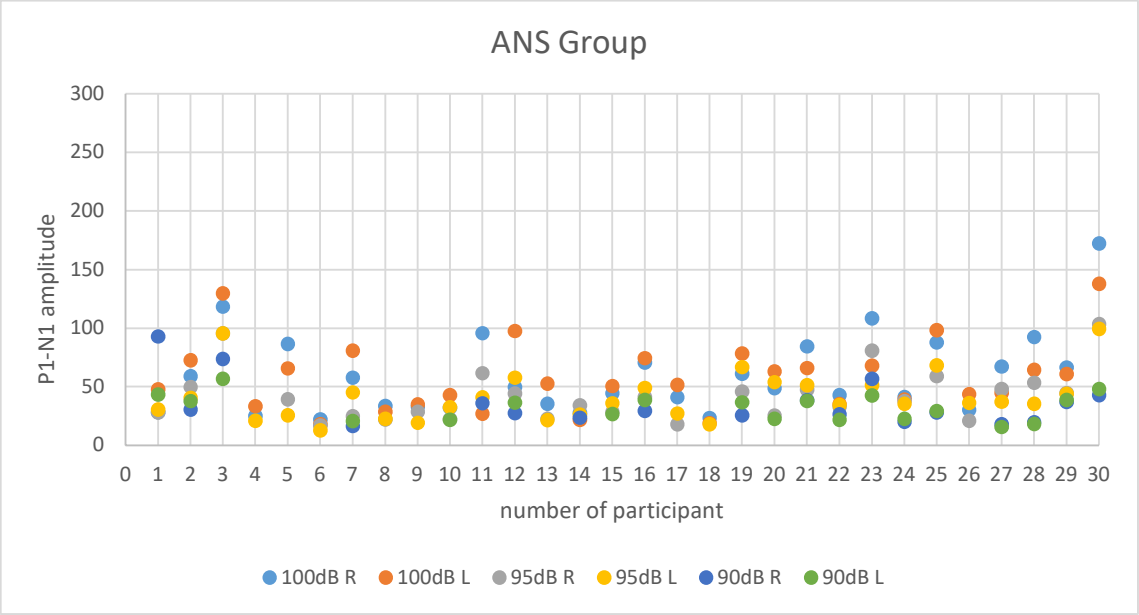

**Supplemental Material S8.** P1-N1 amplitude data of each participant in the ANS group.

Supplement: Supplementary file 3 [file 1]

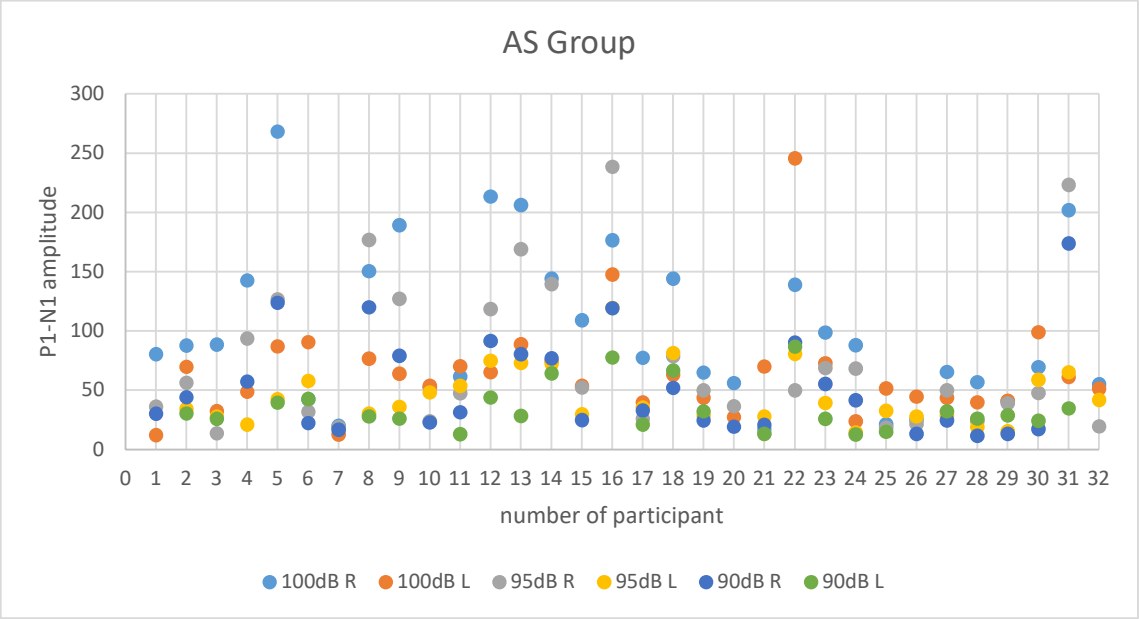

**Supplemental Material S7.** P1-N1 amplitude data of each participant in the AS group.

Supplement: Supplementary file 4 [file 1]

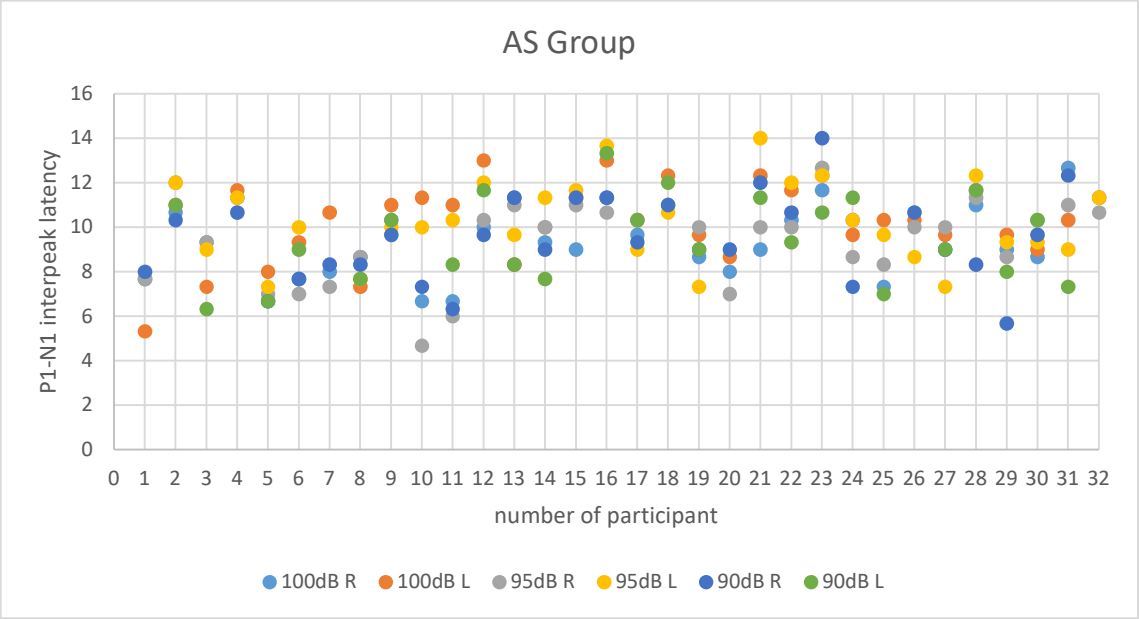

**Supplemental Material S5.** P1-N1 interpeak latency data of each participant in the AS group.

Supplement: Supplementary file 5 [file 1]

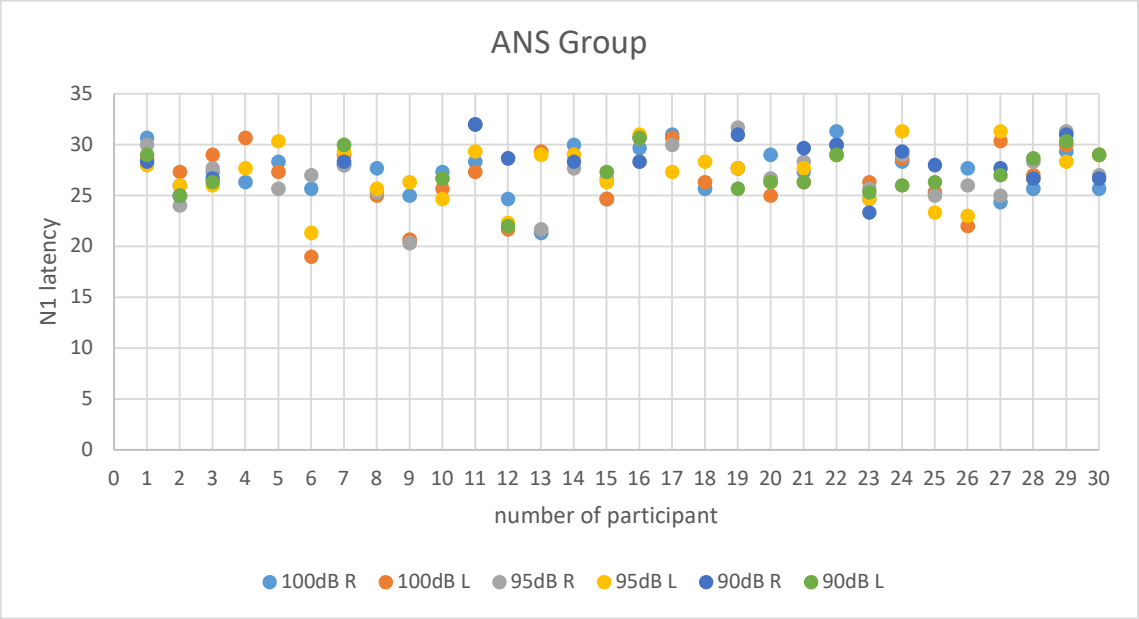

**Supplemental Material S4.** N1 latency data of each participant in the ANS group.

Supplement: Supplementary file 6 [file 1]

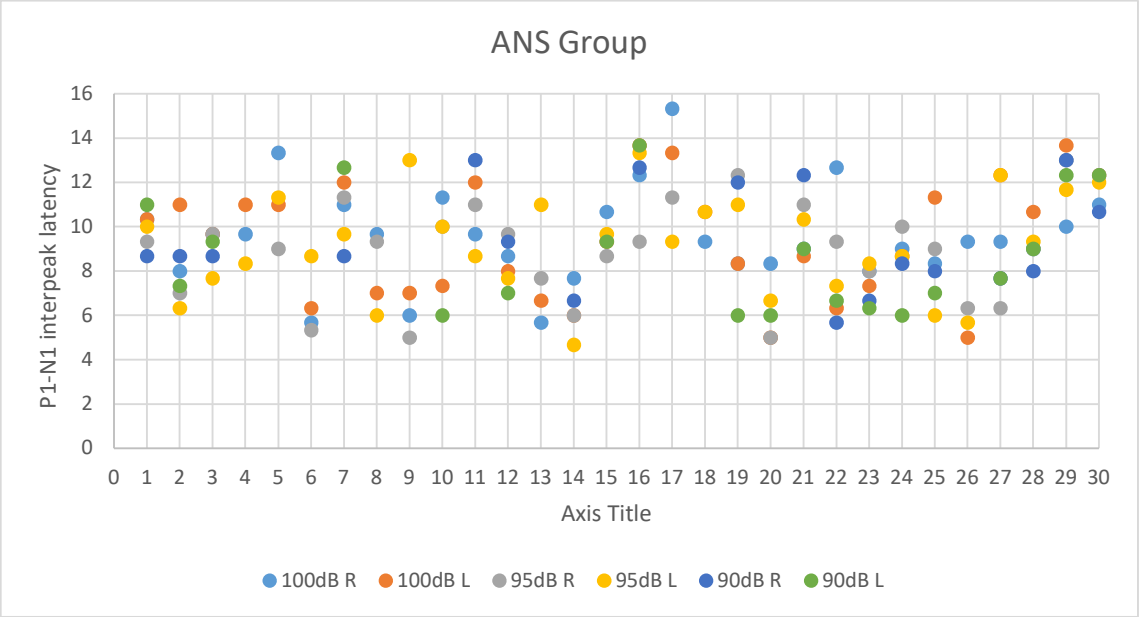

**Supplemental Material S6.** P1-N1 interpeak latency data of each participant in the ANS group.

Supplement: Supplementary file 7 [file 1]

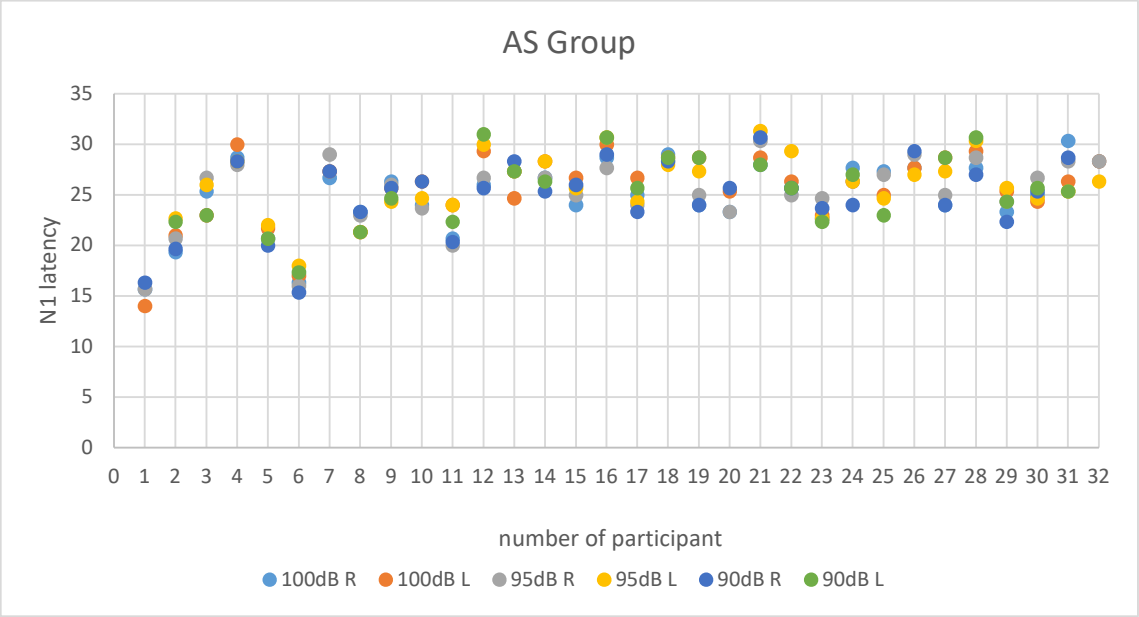

**Supplemental Material S3.** N1 latency data of each participant in the AS group.

Supplement: Supplementary file 8 [file 1]
